# Supplementary material
Source: PubMed Central journal article supplement (PMC7724361)
Supplement: ajtr0012-7386-f6.pdf [file ajtr0012-7386-f6.pdf]

## TBK1 mutation induces ferroptosis

```

hTBK1.seq .....
hTBK1-c978T_A.seq GTCAGATCGCCTGGAGACGCCATCCAGCTGTTTTG
Consensus

hTBK1.seq .....
hTBK1-c978T_A.seq CCATAGAAGACACCGACTCTACTAGAGGATCTATTT
Consensus

hTBK1.seq .....ATGCAGAGCACTTCTAATCATCT
hTBK1-c978T_A.seq TGAATTCCTCGAGATGCAGAGCACTTCTAATCATCT
Consensus atgcagagcacttctaatacatct

hTBK1.seq CTTTTATCTGATATTTTAGGCCAAGGAGCTACTGCA
hTBK1-c978T_A.seq CTTTTATCTGATATTTTAGGCCAAGGAGCTACTGCA
Consensus cttttatctgatatttttaggccaaaggagctactgca

hTBK1.seq TCTTTCGTGGAAGACATAAGAAAACCTGGTGATTAT
hTBK1-c978T_A.seq TCTTTCGTGGAAGACATAAGAAAACCTGGTGATTAT
Consensus tctttcgtggaagacataagaaaactggtgatttat

hTBK1.seq TATCAAAGTATTTAATAACATAAGCTTCCTTCGTCC
hTBK1-c978T_A.seq TATCAAAGTATTTAATAACATAAGCTTCCTTCGTCC
Consensus tatcaaagtatttaataacataagcttccttcgtcc

hTBK1.seq GATGTTCAAATGAGAGAATTTGAAGTGTGAAAAA
hTBK1-c978T_A.seq GATGTTCAAATGAGAGAATTTGAAGTGTGAAAAA
Consensus gatgttcaaatgagagaatttgaagtgtgaaaaa

hTBK1.seq ATCACAAAAATATTGTCAAATTATTGCTATTGAAG
hTBK1-c978T_A.seq ATCACAAAAATATTGTCAAATTATTGCTATTGAAG
Consensus atcacaaaaatattgtcaaattatttgctattgaag

hTBK1.seq GACAACAACAAGACATAAAGTACTTATTATGGAATT
hTBK1-c978T_A.seq GACAACAACAAGACATAAAGTACTTATTATGGAATT
Consensus gacaacaacaagacataaagtacttattatggaatt

hTBK1.seq CCATGTGGGAGTTTATACACTGTTTTAGAAGAACCT
hTBK1-c978T_A.seq CCATGTGGGAGTTTATACACTGTTTTAGAAGAACCT
Consensus ccatgtgggagtttatacactgttttagaagaacct

hTBK1.seq ATGCCTATGGACTACCAGAATCTGAATCTTAATTG
hTBK1-c978T_A.seq ATGCCTATGGACTACCAGAATCTGAATCTTAATTG
Consensus atgcctatggactaccagaatctgaattcttaattg

hTBK1.seq GCGAGATGTGGTGGGTGGAATGAATCATCTACGAGA
hTBK1-c978T_A.seq GCGAGATGTGGTGGGTGGAATGAATCATCTACGAGA
Consensus gcgagatgtgggtgggtggaatgaatcatctacgaga

hTBK1.seq GGTATAGTGCACCGTGATATCAAGCCAGGAAATATC
hTBK1-c978T_A.seq GGTATAGTGCACCGTGATATCAAGCCAGGAAATATC
Consensus ggtatagtgcaccgtgatatcaagccaggaaatatc

hTBK1.seq GTGTTATAGGGGAAGATGGACAGTCTGTGTACAAAC
hTBK1-c978T_A.seq GTGTTATAGGGGAAGATGGACAGTCTGTGTACAAAC
Consensus gtgttataggggaagatggacagtctgtgtacaaac

hTBK1.seq AGATTTGGTGCAGCTAGAGAATTAGAAGATGATGA
hTBK1-c978T_A.seq AGATTTGGTGCAGCTAGAGAATTAGAAGATGATGA
Consensus agatttgggtgcagctagagaattagaagatgatga

hTBK1.seq TTTGTTTCTCTGTATGGCACAGAAGATATTIGCAC
hTBK1-c978T_A.seq TTTGTTTCTCTGTATGGCACAGAAGATATTIGCAC
Consensus tttgtttctctgtatggcacagaagatatttgcac

hTBK1.seq ATATGTATGAGAGAGCAGTGCTAAGAAAAGATCATC
hTBK1-c978T_A.seq ATATGTATGAGAGAGCAGTGCTAAGAAAAGATCATC
Consensus atatgtatgagagagcagtgctaagaaaagatcatc

```

## TBK1 mutation induces ferroptosis

|                   |                                        |
|-------------------|----------------------------------------|
| hTBK1.seq         | GAAATATGGAGCAACAGTTGATCTTTGGAGCATTGG   |
| hTBK1-c978T_A.seq | GAAATATGGAGCAACAGTTGATCTTTGGAGCATTGG   |
| Consensus         | gaaatatggagcaacagttgatctttggagcattgg   |
| hTBK1.seq         | ACATTTTACCATGCAGCTACTGGATCACTGCCATTI   |
| hTBK1-c978T_A.seq | ACATTTTACCATGCAGCTACTGGATCACTGCCATTI   |
| Consensus         | acatTTTaccatgcagctactggatcactgccattt   |
| hTBK1.seq         | CCTTTGAAGGGCCTCGTAGGAATAAAGAAGTGATGT   |
| hTBK1-c978T_A.seq | CCTTTGAAGGGCCTCGTAGGAATAAAGAAGTGATGT   |
| Consensus         | cctttgaagggcctcgtaggaataaagaagtgatgt   |
| hTBK1.seq         | AATAATTACAGGAAAGCCTTCTGGTGCAATATCTGG   |
| hTBK1-c978T_A.seq | AATAATTACAGGAAAGCCTTCTGGTGCAATATCTGG   |
| Consensus         | aataattacaggaagccttctggtgcaatatctgg    |
| hTBK1.seq         | CAGAAAGCAGAAAATGGACCAATTGACTGGAGTGGGA  |
| hTBK1-c978T_A.seq | CAGAAAGCAGAAAATGGACCAATTGACTGGAGTGGGA  |
| Consensus         | cagaaagcagaaaatggaccaattgactggagtggga  |
| hTBK1.seq         | TGCCGTGTTTCTTGCAGTCTTTCTCGGGGTCTTCAGG  |
| hTBK1-c978T_A.seq | TGCCGTGTTTCTTGCAGTCTTTCTCGGGGTCTTCAGG  |
| Consensus         | tgccgtgTTTcttgcagctTTTctcggggTcttcagg  |
| hTBK1.seq         | ACTTACCCCTGTTCTTGCAAACATCCTTGAAGCAGA   |
| hTBK1-c978T_A.seq | ACTTACCCCTGTTCTTGCAAACATCCTTGAAGCAGA   |
| Consensus         | acttaccctgTTcttgcAAacatccttgaagcaga    |
| hTBK1.seq         | GAAAAGTGTTGGGGTTTTGACCAGTTTTTTGCAGAA   |
| hTBK1-c978T_A.seq | GAAAAGTGTTGGGGTTTTGACCAGTTTTTTGCAGAA   |
| Consensus         | gaaaagtgTTggggTTTTgaccagTTTTttgcagaa   |
| hTBK1.seq         | GTGATATACTTCACCGAATGGTAATTCATGTTTTT    |
| hTBK1-c978T_A.seq | GTGATATACTTCACCGAATGGTAATTCATGTTTTT    |
| Consensus         | gtgatatacttcaccgaatggtaattcatgTTTTT    |
| hTBK1.seq         | ACAACAATGACAGCTCATAAGATTTATATTCATAG    |
| hTBK1-c978T_A.seq | ACAACAATGACAGCTCATAAGATTTATATTCATAG    |
| Consensus         | acaacaatgacagctcataagatttatat catag    |
| hTBK1.seq         | AATACTGCTACTATATTTTCATGAACCTGGTATATAAA |
| hTBK1-c978T_A.seq | AATACTGCTACTATATTTTCATGAACCTGGTATATAAA |
| Consensus         | aatactgctactatattttcatgaactggatataaaa  |
| hTBK1.seq         | CCAAAATTATTTCTTCAAATCAAGAACTTATCTACG   |
| hTBK1-c978T_A.seq | CCAAAATTATTTCTTCAAATCAAGAACTTATCTACG   |
| Consensus         | ccaaaattatTTcttcaaATcaagaacttatctacg   |
| hTBK1.seq         | GCGACGCTTAGTCTTAGAACCTGGAAGGCTGGCACA   |
| hTBK1-c978T_A.seq | GCGACGCTTAGTCTTAGAACCTGGAAGGCTGGCACA   |
| Consensus         | gcgacgcttagtcttagaacctggaaggctggcaca   |
| hTBK1.seq         | TTCCCTAAAACACTACTGAGGAAAACCCTATATTGTA  |
| hTBK1-c978T_A.seq | TTCCCTAAAACACTACTGAGGAAAACCCTATATTGTA  |
| Consensus         | ttccctaaaactactgaggaaaaccctatatttgta   |
| hTBK1.seq         | GCCGGGAACCTCTGAATACCATAGGATTAATATATG   |
| hTBK1-c978T_A.seq | GCCGGGAACCTCTGAATACCATAGGATTAATATATG   |
| Consensus         | gccgggaacctctgaataccataggattaatatatg   |
| hTBK1.seq         | AATTTCCCTCCCTAAAGTACATCCACGTTATGATTT   |
| hTBK1-c978T_A.seq | AATTTCCCTCCCTAAAGTACATCCACGTTATGATTT   |
| Consensus         | aatttccctccctaaagtacatccacgTTatgattt   |
| hTBK1.seq         | GGGGATGCTAGCATGGCTAAGGCAATAACAGGGGTT   |
| hTBK1-c978T_A.seq | GGGGATGCTAGCATGGCTAAGGCAATAACAGGGGTT   |
| Consensus         | ggggatgctagcatggctaaggcaataacaggggTT   |

## TBK1 mutation induces ferroptosis

|                   |                                       |
|-------------------|---------------------------------------|
| hTBK1.seq         | GTTATGCCTGCAGAATTGCCAGTACCTTACTGCTTT  |
| hTBK1-c978T_A.seq | GTTATGCCTGCAGAATTGCCAGTACCTTACTGCTTT  |
| Consensus         | gttatgcctgcagaattgccagtaccttactgcttt  |
| hTBK1.seq         | GGAATTAATGCGAAAGGGGATACGATGGCTGATTGA  |
| hTBK1-c978T_A.seq | GGAATTAATGCGAAAGGGGATACGATGGCTGATTGA  |
| Consensus         | ggaattaatgcgaaaggggatacगतgctgattga    |
| hTBK1.seq         | ATTAAAGATGATTACAATGAACTGTTACAAAAAG    |
| hTBK1-c978T_A.seq | ATTAAAGATGATTACAATGAACTGTTACAAAAAG    |
| Consensus         | attaagatgattacaatgaaactgttcacaaaaag   |
| hTBK1.seq         | AAGTTGTGATCACATTGGATTCTGTATCAGAAACA   |
| hTBK1-c978T_A.seq | AAGTTGTGATCACATTGGATTCTGTATCAGAAACA   |
| Consensus         | aagttgtgatcacattggatttctgtatcagaaca   |
| hTBK1.seq         | AAAACTGTGAAAGTATATGAAAAGTTGATGAAGAT   |
| hTBK1-c978T_A.seq | AAAACTGTGAAAGTATATGAAAAGTTGATGAAGAT   |
| Consensus         | aaaaactgtgaaagtatatgaaaagttgatgaagat  |
| hTBK1.seq         | CTGGAAGCGGCAGAGTTAGGTGAAATTCAGACATA   |
| hTBK1-c978T_A.seq | CTGGAAGCGGCAGAGTTAGGTGAAATTCAGACATA   |
| Consensus         | ctggaagcggcagagttaggtgaaatttcagacata  |
| hTBK1.seq         | CCAAATTGTTGAGACTTCCAGTTCTCAGGGAACAA   |
| hTBK1-c978T_A.seq | CCAAATTGTTGAGACTTCCAGTTCTCAGGGAACAA   |
| Consensus         | ccaaattgttgagacttccagttctcagggaacaa   |
| hTBK1.seq         | AACCAGTCTTCAGGATATCGACAGCAGATTATCTCC  |
| hTBK1-c978T_A.seq | AACCAGTCTTCAGGATATCGACAGCAGATTATCTCC  |
| Consensus         | aaccagtcttcaggatatcgacagcagattatctcc  |
| hTBK1.seq         | GGATCACTGGCAGACGCATGGGCACATCAAGAAGGC  |
| hTBK1-c978T_A.seq | GGATCACTGGCAGACGCATGGGCACATCAAGAAGGC  |
| Consensus         | ggatcactggcagacgcатgggcacatcaagaaggc  |
| hTBK1.seq         | ATCCGAAAGACAGAAATGTAGAAAACTACAAGTCC   |
| hTBK1-c978T_A.seq | ATCCGAAAGACAGAAATGTAGAAAACTACAAGTCC   |
| Consensus         | atccgaaagacagaaatgtagaaaaactacaagtcc  |
| hTBK1.seq         | AAATTGCATGACAGAGATTTACTATCAGTTCAAAAA  |
| hTBK1-c978T_A.seq | AAATTGCATGACAGAGATTTACTATCAGTTCAAAAA  |
| Consensus         | aaattgcatgacagagatttactatcagttcaaaaa  |
| hTBK1.seq         | AAAGCAGAACGTAGATTAGCTTATAATGAAGAACAA  |
| hTBK1-c978T_A.seq | AAAGCAGAACGTAGATTAGCTTATAATGAAGAACAA  |
| Consensus         | aaagcagaacgtagattagcttataatgaagaacaa  |
| hTBK1.seq         | ACAAATTTGATAAGCAAAAACCTGTATTACCATGCCA |
| hTBK1-c978T_A.seq | ACAAATTTGATAAGCAAAAACCTGTATTACCATGCCA |
| Consensus         | acaaat ttgataagcaaaaactgtattaccatgcca |
| hTBK1.seq         | AGCTATGACGCACCTTACAGATGAATGTGTTAAAAA  |
| hTBK1-c978T_A.seq | AGCTATGACGCACCTTACAGATGAATGTGTTAAAAA  |
| Consensus         | agctatgacgcactttacagatgaatgtgttaaaaa  |

Supplementary Figure 1. The sequence of hTBK1-c.978T>A mutation in NSC-34 cells.
